# Supplementary material
Source: Elsevier journal article supplement (https://www.sciencedirect.com/science/article/pii/S0214916813001253)
Supplement: mmc1 [file S0214916813001253:mmc1.doc]

Antonio Becerra

Carles Brotons

Mª del Mar Campos

Fernando Civeira

Fernando Escobar

Jacinto Fernández-Pardo

Juan Ferrando

Francisco Javier García-Norro

Olga García Vallejo

Carlos Guijarro

Carlos Lahoz

Alipio Mangas

Alfonso del Río Ligorit

Manuel Suárez Tembra
